# Supplementary material
Source: bioRxiv or medRxiv preprint supplement (https://www.biorxiv.org/highwire/filestream/61488/field_highwire_adjunct_files/0/117994-1.pdf)
Supplement: Supplementary file [file 117994-1.pdf]

GROOLS: reactive graph reasoning for genome annotation through biological processes - Supplementary Data 1

Prediction accuracy for pathways (PWY) and functional units (FU) in 14 organisms

| Organisms (UniProtKB proteome)                |     | Genome Properties: UniProtKB annotations, falsehood mode |     |    |     |        | UniPathway: MicroScope annotations, specific mode |    |    |    |        |
|-----------------------------------------------|-----|----------------------------------------------------------|-----|----|-----|--------|---------------------------------------------------|----|----|----|--------|
|                                               |     | TP                                                       | TN  | FP | FN  | ACC    | TP                                                | TN | FP | FN | ACC    |
| Acinetobacter baylyi ADP1 (UP000000430)       | PWY | 13                                                       | 8   | 4  | 2   | 77.78% | 21                                                | 10 | 5  | 3  | 79.49% |
|                                               | FU  | 75                                                       | 104 | 14 | 3   | 91.33% | 272                                               | 35 | 0  | 7  | 97.77% |
| Pseudomonas putida KT2440 (UP000000556)       | PWY | 17                                                       | 6   | 4  | 2   | 79.31% | 28                                                | 9  | 5  | 10 | 71.15% |
|                                               | FU  | 96                                                       | 55  | 6  | 3   | 94.38% | 222                                               | 35 | 2  | 19 | 92.45% |
| Escherichia coli K-12 (UP000000625)           | PWY | 18                                                       | 4   | 5  | 1   | 78.57% | 27                                                | 6  | 2  | 9  | 75.00% |
|                                               | FU  | 138                                                      | 47  | 10 | 1   | 94.39% | 111                                               | 17 | 5  | 15 | 86.49% |
| Delftia acidovorans DSM14801 (UP000000784)    | PWY | 16                                                       | 6   | 3  | 2   | 81.48% | 27                                                | 10 | 4  | 5  | 80.43% |
|                                               | FU  | 105                                                      | 35  | 3  | 7   | 93.33% | 96                                                | 34 | 7  | 25 | 80.25% |
| Agrobacterium tumefaciens C58 (UP000000813)   | PWY | 17                                                       | 3   | 3  | 6   | 68.97% | 25                                                | 2  | 2  | 12 | 65.85% |
|                                               | FU  | 100                                                      | 25  | 6  | 56  | 66.84% | 146                                               | 3  | 2  | 37 | 79.26% |
| Pedobacter heparinus DSM2366 (UP000000852)    | PWY | 8                                                        | 7   | 1  | 9   | 60.00% | 18                                                | 12 | 8  | 6  | 68.18% |
|                                               | FU  | 62                                                       | 51  | 2  | 103 | 51.83% | 68                                                | 51 | 19 | 32 | 70.00% |
| Roseobacter litoralis DSM6996 (UP000001353)   | PWY | 11                                                       | 3   | 3  | 4   | 66.67% | 20                                                | 4  | 3  | 1  | 85.71% |
|                                               | FU  | 69                                                       | 29  | 3  | 10  | 88.29% | 77                                                | 9  | 6  | 16 | 79.63% |
| Bacillus subtilis 168 (UP000001570)           | PWY | 18                                                       | 4   | 3  | 1   | 84.62% | 23                                                | 6  | 5  | 4  | 76.32% |
|                                               | FU  | 130                                                      | 33  | 10 | 1   | 93.68% | 296                                               | 26 | 0  | 18 | 94.71% |
| Sphingomonas wittichii DSM6014 (UP000001989)  | PWY | 12                                                       | 4   | 6  | 5   | 59.26% | 22                                                | 11 | 9  | 5  | 70.21% |
|                                               | FU  | 85                                                       | 94  | 9  | 12  | 89.50% | 87                                                | 59 | 14 | 12 | 84.88% |
| Spirosoma linguale DSM74 (UP000002028)        | PWY | 10                                                       | 6   | 4  | 8   | 57.14% | 18                                                | 11 | 5  | 4  | 76.32% |
|                                               | FU  | 64                                                       | 54  | 6  | 84  | 56.73% | 66                                                | 36 | 9  | 12 | 82.93% |
| Chitinophaga pinensis DSM2588 (UP000002215)   | PWY | 9                                                        | 4   | 4  | 8   | 52.00% | 18                                                | 12 | 10 | 5  | 66.67% |
|                                               | FU  | 62                                                       | 40  | 15 | 49  | 61.45% | 69                                                | 51 | 26 | 28 | 68.97% |
| Pseudomonas aeruginosa PAO1 (UP000002438)     | PWY | 18                                                       | 3   | 3  | 4   | 75.00% | 27                                                | 8  | 3  | 5  | 81.40% |
|                                               | FU  | 130                                                      | 29  | 3  | 5   | 95.21% | 108                                               | 27 | 5  | 17 | 85.99% |
| Kytococcus sedentarius DSM20547 (UP000006666) | PWY | 3                                                        | 5   | 5  | 12  | 32.00% | 15                                                | 16 | 7  | 9  | 65.96% |
|                                               | FU  | 39                                                       | 90  | 14 | 61  | 63.24% | 47                                                | 69 | 19 | 44 | 64.80% |
| Salmonella typhimurium SL1344 (UP000008962)   | PWY | 14                                                       | 3   | 5  | 1   | 73.91% | 21                                                | 13 | 9  | 2  | 75.56% |
|                                               | FU  | 81                                                       | 24  | 16 | 1   | 86.07% | 77                                                | 52 | 26 | 1  | 82.69% |
